# Supplementary material
Source: Springer Nature journal article supplement (https://www.springermedizin.de/resource/supplementary/12979_2009_75_MOESM1_ESM.pdf/9603340)

# BDNF

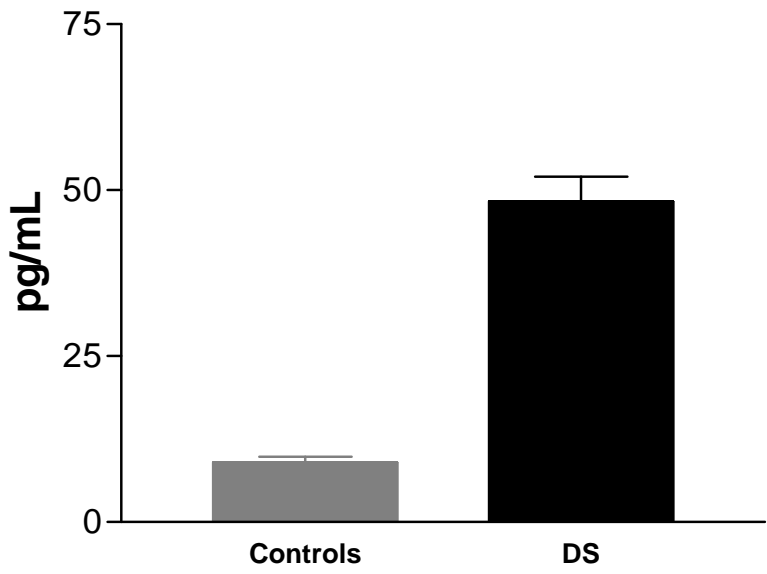

A

# IL-6

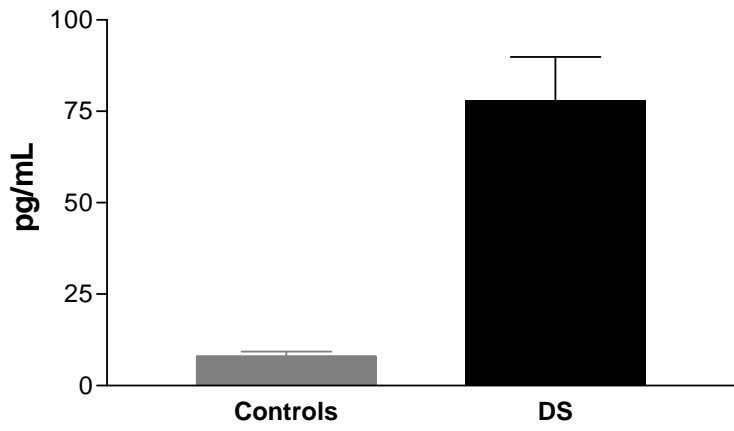

B

# MCP-1/CCL-2

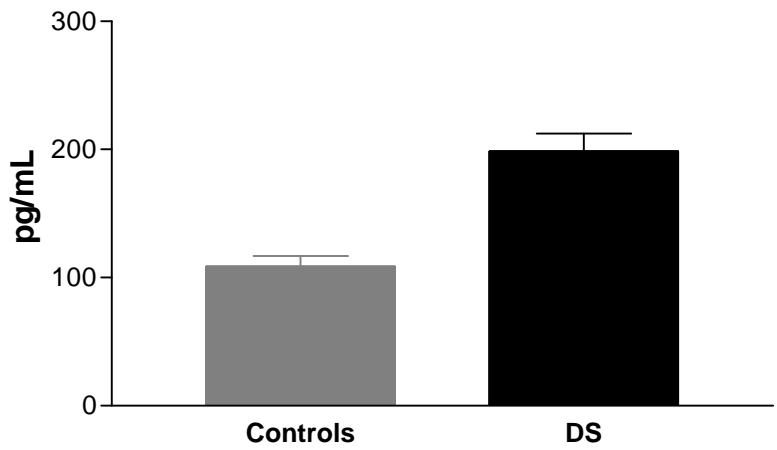

C

Supplement: MOESM1 [file 9603340]
